# Supplementary material
Source: PubMed Central journal article supplement (PMC6522295)

Supplementary Figure 1

Patient Selection for the Prospective Cohort

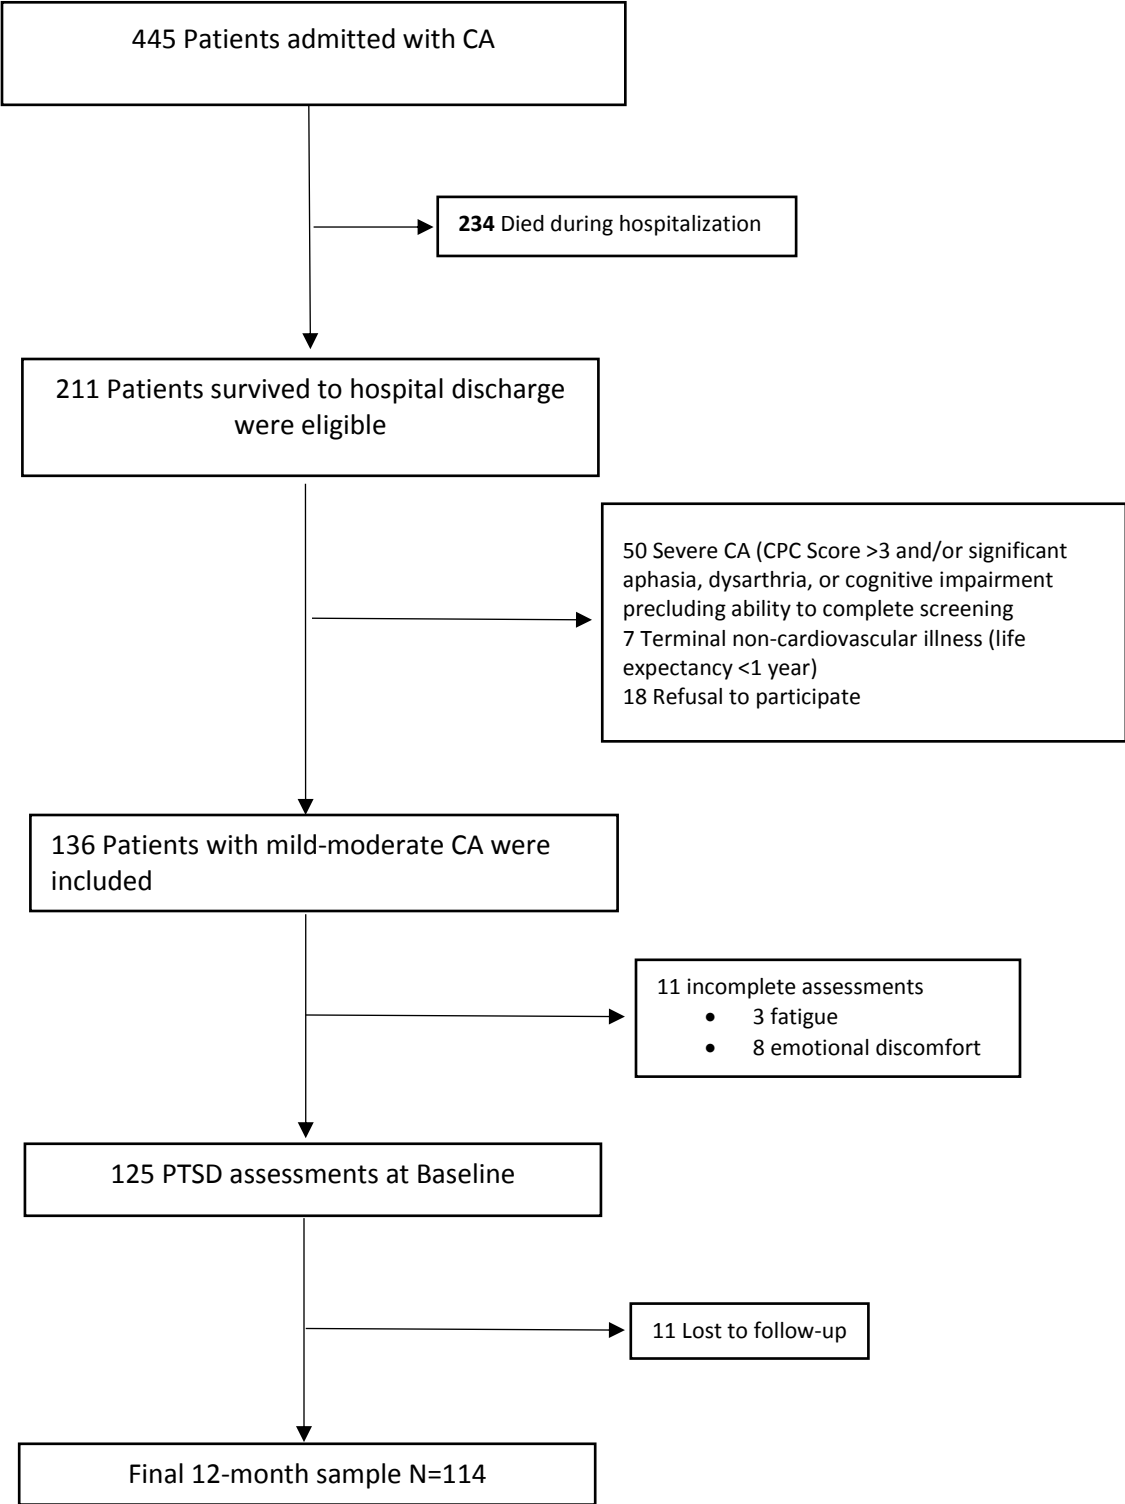

Supplement: NIHMS1522192-supplement-Supplemental_Data_File___doc___tif__pdf__etc___1.pdf [file NIHMS1522192-supplement-Supplemental_Data_File___doc___tif__pdf__etc___1.pdf]

Adjusted Kaplan-Meier survival estimates

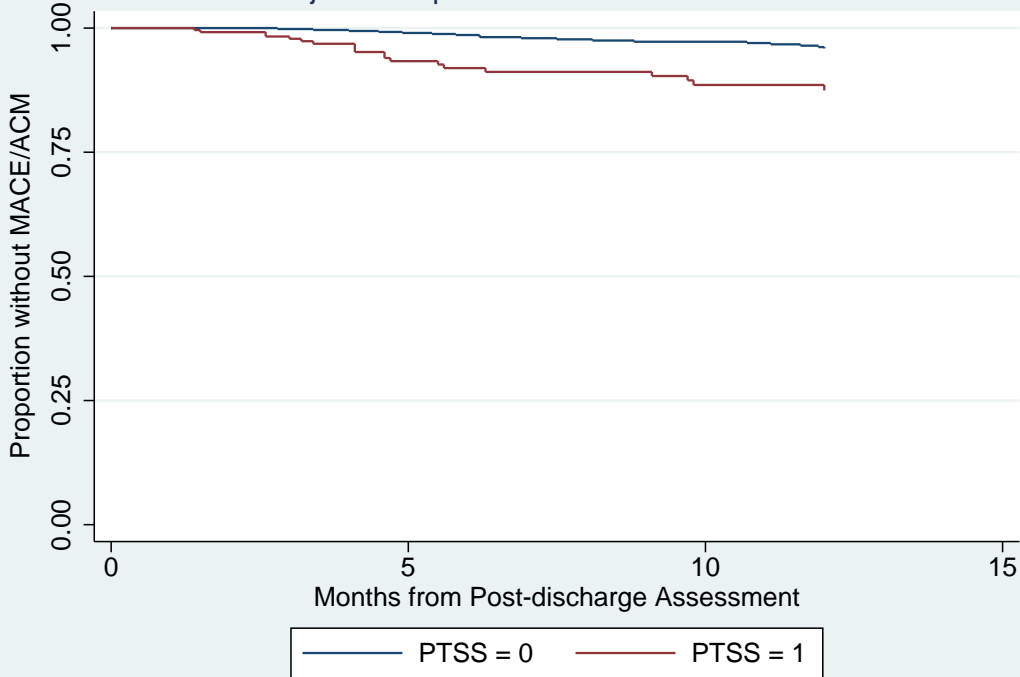

Supplement: NIHMS1522192-supplement-Supplemental_Data_File___doc___tif__pdf__etc___3.pdf [file NIHMS1522192-supplement-Supplemental_Data_File___doc___tif__pdf__etc___3.pdf]
